# Supplementary material for: Acute Myocardial Infarction among Hospitalizations for Heat Stroke in the United States
Source: PubMed Central journal article supplement (PMC7290741; doi:10.3390/jcm9051357), 2020-05-06
Supplement: jcm-09-01357-s001.pdf [file jcm-09-01357-s001.pdf]

Table 1. ICD-9 code for patient characteristics, treatments, and outcomes.

|                             |                                                                                                                                                                                                                    |
|-----------------------------|--------------------------------------------------------------------------------------------------------------------------------------------------------------------------------------------------------------------|
| Characteristics             |                                                                                                                                                                                                                    |
| Smoking                     | 305.1, 649.0, 989.84                                                                                                                                                                                               |
| Alcohol drinking            | 291.0, 291.1, 291.2, 291.3, 291.4, 291.5, 291.8, 291.81, 291.82, 291.89, 303.00-303.03, 303.90-303.93, 305.00-305.03                                                                                               |
| Obesity                     | 278.0, 278.00, 278.01, 649.10– 649.14, 793.91, V85.30–V85.4, V85.54                                                                                                                                                |
| Diabetes Mellitus           | 249.00–249.31, 250.00–250.33, 648.00–648.04, 249.40–249.91, 250.40–250.93, 775.1                                                                                                                                   |
| Hypertension                | 401.1, 401.9, 642.00–642.24, 401.0, 402.00– 405.99, 437.2, 642.10–624.24, 642.70–642.94                                                                                                                            |
| Dyslipidemia                | 272.xx                                                                                                                                                                                                             |
| Hypothyroidism              | 243.xx, 244.xx                                                                                                                                                                                                     |
| Congestive heart failure    | 428.xx                                                                                                                                                                                                             |
| Chronic kidney disease      | 585.1, 585.2, 585.3, 585.3, 585.4, 585.5, 585.6, 585.9                                                                                                                                                             |
| Coronary artery disease     | 412.xx, 413.xx, 414.xx                                                                                                                                                                                             |
| Atrial flutter/fibrillation | 427.31, 427.32                                                                                                                                                                                                     |
| Complication                |                                                                                                                                                                                                                    |
| Rhabdomyolysis              | 728.88                                                                                                                                                                                                             |
| Hyponatremia                | 276.1                                                                                                                                                                                                              |
| Hypernatremia               | 276.0                                                                                                                                                                                                              |
| Hypokalemia                 | 276.8                                                                                                                                                                                                              |
| Hyperkalemia                | 276.7                                                                                                                                                                                                              |
| Hypocalcemia                | 275.41                                                                                                                                                                                                             |
| Hypercalcemia               | 275.42                                                                                                                                                                                                             |
| Metabolic acidosis          | 276.2                                                                                                                                                                                                              |
| Metabolic alkalosis         | 276.3                                                                                                                                                                                                              |
| Gastrointestinal bleeding   | 578.xx                                                                                                                                                                                                             |
| Sepsis                      | 038.0, 038.10, 038.11, 038.19, 038.2, 038.3, 038.4, 038.40, 038.41, 038.42, 038.43, 038.44, 038.49, 038.8, 038.9, 790.7, 117.9, 112.5, 115.04, 115.14, 115.94, 112.81, 112.83, 003.1, 003.21, 036.2, 036.3, 036.0, |

|                                        |                                                                     |
|----------------------------------------|---------------------------------------------------------------------|
|                                        | 036.1, 036.42, 020.2, 022.3, 098.89, 098.84, 098.82, 995.92, 785.52 |
| Ventricular arrhythmia /Cardiac arrest | 427.1, 427.41, 427.5                                                |
| Treatment                              |                                                                     |
| Invasive mechanical ventilation        | 96.70-96.73                                                         |
| Blood component transfusion            | 99.00-99.07                                                         |
| Renal replacement therapy              | 39.95                                                               |

| Organ Failure | Description                                                                                                                                                                 | ICD-9CM                                                          |
|---------------|-----------------------------------------------------------------------------------------------------------------------------------------------------------------------------|------------------------------------------------------------------|
| Respiratory   | Acute respiratory failure                                                                                                                                                   | 518.81                                                           |
|               | Other pulmonary insufficiency, not elsewhere classified.<br>Includes - acute respiratory distress, acute respiratory insufficiency, adult respiratory distress syndrome NEC | 518.82                                                           |
|               | Acute respiratory distress syndrome after shock or trauma                                                                                                                   | 518.85                                                           |
|               | Respiratory distress NOS                                                                                                                                                    | 786.09                                                           |
|               | Respiratory arrest                                                                                                                                                          | 799.1                                                            |
|               | Ventilator management                                                                                                                                                       | 96.7, 96.70, 96.71, 96.72                                        |
| Circulatory   | Shock without mention of trauma                                                                                                                                             | 785.5                                                            |
|               | Shock unspecified                                                                                                                                                           | 785.50                                                           |
|               | Other shock without trauma (includes hypovolemic Shock)                                                                                                                     | 785.59                                                           |
|               | Cardiogenic shock                                                                                                                                                           | 785.51                                                           |
|               | Septic shock                                                                                                                                                                | 785.52                                                           |
|               | Hypotension NOS                                                                                                                                                             | 458.8, 458.9, 796.3                                              |
| Renal         | Acute kidney injury                                                                                                                                                         | 584, 584.5, 584.6, 584.7, 584.8, 584.9<br>(exclude 585.5, 585.6) |
| Hepatic       | Acute hepatic failure or necrosis                                                                                                                                           | 570                                                              |
|               | Hepatic encephalopathy                                                                                                                                                      | 572.2                                                            |
|               | Hepatitis unspecified                                                                                                                                                       | 573.3                                                            |

|             |                                             |                                                                         |
|-------------|---------------------------------------------|-------------------------------------------------------------------------|
|             | Hepatic infarction                          | 573.4                                                                   |
| Hematologic | Defibrination syndrome                      | 286.6                                                                   |
|             | Acquired coagulation factor deficiency      | 286.7                                                                   |
|             | Other coagulation defect                    | 286.9                                                                   |
|             | Thrombocytopenia - secondary or unspecified | 287.49, 287.5                                                           |
| Metabolic   | Acidosis – metabolic or lactic              | 276.2                                                                   |
| Neurologic  | Transient organic psychotic conditions      | 293, 293.0, 293.1, 293.8, 293.81, 293.82, 293.83, 293.84, 293.89, 293.9 |
|             | Anoxic brain injury                         | 348.1                                                                   |
|             | Acute encephalopathy                        | 348.3, 348.30, 348.31, 348.39                                           |
|             | Coma                                        | 780.01                                                                  |
|             | Altered consciousness - unspecified         | 780.09                                                                  |
|             | Electroencephalogram                        | 89.14                                                                   |
|             | Convulsion                                  | 780.39                                                                  |
